# Supplementary material for: The challenges of predicting pesticide exposure of honey bees at landscape level
Source: PubMed Central journal article supplement (PMC5476569; doi:10.1038/s41598-017-03467-5), 2017-06-19

## Supplementary figures and tables for the paper

### “The challenges of predicting pesticide exposure of honey bees at landscape level”

Noa Simon-Delso<sup>a\*</sup>, Gilles San Martin<sup>b</sup>, Etienne Bruneau<sup>a</sup>, Christine Delcourt<sup>a</sup>, Louis Hautier<sup>b</sup>

<sup>a</sup> Beekeeping Research and Information Centre (CARI), Place Croix du Sud 4, 1348 Louvain la Neuve, Belgium

<sup>b</sup> Walloon Agricultural Research Centre, Life Sciences Department, Plant Protection and Ecotoxicology Unit, Rue de Liroux, 2, B-5030 Gembloux, Belgium

\*Corresponding author: Noa Simon-Delso, [simon@cari.be](mailto:simon@cari.be)

## Contents

|                                                                                                                                                                                  |           |
|----------------------------------------------------------------------------------------------------------------------------------------------------------------------------------|-----------|
| <b>Introduction</b> .....                                                                                                                                                        | <b>2</b>  |
| <b>Pesticides: exploratory analysis</b> .....                                                                                                                                    | <b>2</b>  |
| Table S1a: Pesticides analyzed + LOQ .....                                                                                                                                       | 2         |
| Table S1b: Summary table of the pesticides found in pollen samples .....                                                                                                         | 4         |
| <b>Agricultural landscape: exploratory analysis</b> .....                                                                                                                        | <b>5</b>  |
| Table S2a: Landscape land use categories used.....                                                                                                                               | 5         |
| Table S2b. Total areas (ha) for each grouped agricultural land use category in the 3000 m buffers around the apiaries and the areas of authorized crops for each pesticide ..... | 7         |
| Fig. S1a and S1b : Heatmaps of the landscape dataset .....                                                                                                                       | 7         |
| Fig S1c. Heatmap of the correlation matrix of the areas of crops and grasslands 3000 m around the apiaries .....                                                                 | 10        |
| <b>Pollen: exploratory analysis</b> .....                                                                                                                                        | <b>11</b> |
| Table S3: Pollen codes .....                                                                                                                                                     | 11        |
| Fig. S2a: Heatmap of the pollen dataset .....                                                                                                                                    | 12        |
| Fig. S2b: Total number of pollen grains from different botanical origin per month .....                                                                                          | 14        |
| <b>Pesticides vs Agricultural Landscape</b> .....                                                                                                                                | <b>15</b> |
| Boscalid.....                                                                                                                                                                    | 15        |
| Table S4: Boscalid vs cultures models.....                                                                                                                                       | 15        |
| Pyrimethanil .....                                                                                                                                                               | 18        |
| Table S5: Pyrimethanil vs cultures models .....                                                                                                                                  | 18        |
| Table S6: Pyrimethanil vs peas crops models.....                                                                                                                                 | 20        |
| Dimethoate.....                                                                                                                                                                  | 21        |
| Table S7: Dimethoate vs cultures models .....                                                                                                                                    | 21        |
| <b>Pollen vs Landscape</b> .....                                                                                                                                                 | <b>23</b> |
| Fig. S3 Pollen vs landscape RDA triplot.....                                                                                                                                     | 23        |

## Introduction

Please look at the Supplementary Material 2 for full analysis with code, data and full results and interpretation (including these figures and tables).

## Pesticides: exploratory analysis

### *Table S1a: Pesticides analyzed + LOQ*

Summary of all pesticides (and some products of degradation) that have been looked for into the trap pollen samples + LOQ values in  $\mu\text{g}/\text{kg}$  ( $10^{-3}$  mg/kg)

| fullname           | type | LOQ_Pollen |
|--------------------|------|------------|
| Amitraz            | A    | 5          |
| Beta-cyfluthrin    | I    | 5          |
| Bifenthrin         | I    | 3          |
| Boscalid           | F    | 7.5        |
| Captan             | F    | 7.5        |
| Carbaryl           | I    | 0.75       |
| Chlorpyrifos       | I    | 5          |
| Clothianidin       | I    | 0.75       |
| Coumaphos          | A    | 5          |
| Cyfluthrin         | I    | 5          |
| Cyprodinil         | F    | 5          |
| Deltamethrine      | I    | 5          |
| Dimethoate         | I    | 0.75       |
| Esfenvalerate      | I    | 7.5        |
| Fenpropimorph      | F    | 7.5        |
| Fipronil           | I    | 1          |
| Heptenophos        | I    | 7.5        |
| Imidacloprid       | I    | 0.75       |
| Indoxacarb         | I    | 7.5        |
| Iprodione          | F    | 7.5        |
| Kresoxim-methyl    | F    | 7.5        |
| Lambda-cyhalothrin | I    | 7.2        |
| Piperonyl butoxide | S    | 7.5        |
| Pirimicarb         | I    | 5          |
| Propamocarb        | F    | 5          |

| <b>fullname</b>      | <b>type</b> | <b>LOQ_Pollen</b> |
|----------------------|-------------|-------------------|
| Pyraclostrobin       | F           | 5                 |
| Pyrimethanil         | F           | 5                 |
| Tau-fluvalinate      | IA          | 7.5               |
| Tebuconazole         | F           | 7.5               |
| Tebufenozide         | I           | 7.5               |
| Terbuthylazine       | H           | 7.5               |
| Thiacloprid          | I           | 0.75              |
| Thiamethoxam         | I           | 0.75              |
| Thiophanate-methyl   | F           | 5                 |
| Trifloxystrobin      | F           | 7.5               |
| Zoxamide             | F           | 7.5               |
| Fipronil carboxamide | I           | 7.5               |
| Fipronil desulfinil  | I           | 7.5               |
| Fipronil sulfone     | I           | 7.5               |
| 5-OH Imidacloprid    | I           | 7.5               |
| Desnitroimidacloprid | I           | 7.5               |
| 6-Cloronicotinc acid | I           | 7.5               |
| Olefin               | I           | 7.5               |
| Urea Derivate        | I           | 7.5               |

**Table S1b: Summary table of the pesticides found in pollen samples**

Type : F = Fungicide, I = Insecticide. Nb = number of positive samples. NbTot = total number of samples analyzed. The columns Min, Max, Median, Mean and SD (Standard deviation) provide descriptive statistics of the quantities (mg/kg) observed in the positive samples only.

| <b>Pesticide</b> | <b>Type</b> | <b>Nb</b> | <b>NbTot</b> | <b>Min</b> | <b>Max</b> | <b>Median</b> | <b>Mean</b> | <b>SD</b> |
|------------------|-------------|-----------|--------------|------------|------------|---------------|-------------|-----------|
| boscalid         | F           | 19        | 60           | 0.70       | 512.00     | 4.10          | 37.93       | 116.50    |
| pyrimethanil     | F           | 10        | 60           | 0.60       | 21.70      | 1.90          | 4.93        | 6.60      |
| dimethoate       | I           | 10        | 60           | 0.21       | 1.40       | 0.40          | 0.53        | 0.40      |
| trifloxystrobin  | F           | 1         | 60           |            |            | 15.40         |             |           |
| thiamethoxam     | I           | 1         | 60           |            |            | 1.60          |             |           |
| kresoxim-methyl  | F           | 1         | 60           |            |            | 2.40          |             |           |
| cyprodinil       | F           | 1         | 60           |            |            | 1.50          |             |           |

## Agricultural landscape: exploratory analysis

### Table S2a: Landscape land use categories used

In the following table we show how we have used the different agricultural land use informations that were available :

- Agri : is the detailed land use types provided by the SIGEC (agricultural aids administration). The name are in French but most of them have been translated in the paper.
- Agri\_group : we have grouped the detailed Agri into these more general denominations to reduce the number of categories
- Areas : sum of the areas (ha) in the 3000 m buffers for all the apiaries
- Dime, Pyri, Bosc : is the use of dimethoate, pyrimethanil, boscalid authorized at least partially for each detailed culture type ? When we have calculated the areas of cultures authorized for each pesticide, we used the detailed Agri codes before grouping. For example for dimethoate, the authorized Fabaceae areas are only using the Peas areas, not the other detailed cultures that have been grouped under the name of Fabaceae for other analyses.

| Agri                                                 | Agri_group | Areas | Bosc | Dime | Pyri |
|------------------------------------------------------|------------|-------|------|------|------|
| BoscBetterave sucrière                               | Beet       | 4578  | yes  |      |      |
| Chicorée à inuline                                   | Beet       | 675   | yes  |      |      |
| Betterave fourragère                                 | Beet       | 63.7  | yes  |      |      |
| Chicorée à café                                      | Beet       | 3.4   | yes  |      |      |
| Froment d'hiver                                      | Cereals    | 12986 |      |      | yes  |
| Orge d'hiver                                         | Cereals    | 3004  |      |      | yes  |
| Epeautre                                             | Cereals    | 600   |      |      | yes  |
| Froment de printemps ou froment alternatif           | Cereals    | 287.5 |      |      | yes  |
| Avoine                                               | Cereals    | 151.4 |      |      | yes  |
| Triticale                                            | Cereals    | 101.5 |      |      | yes  |
| Orge de printemps                                    | Cereals    | 74    |      |      | yes  |
| Autres grains (p.e mélanges)                         | Cereals    | 62.7  |      |      |      |
| Orge de brasserie                                    | Cereals    | 26.8  |      |      | yes  |
| Autres céréales (Sorgho, millet, alpiste et blé dur) | Cereals    | 8.6   |      |      |      |
| Seigle d'hiver                                       | Cereals    | 0.9   |      |      | yes  |
| Maïs ensilage                                        | Corn       | 3976  |      |      |      |
| Maïs grain                                           | Corn       | 696.2 |      |      |      |
| Tournière enherbée                                   | Cover      | 565.5 |      |      |      |
| Autres couvertures (Moutarde, Phacélie,etc.)         | Cover      | 47    |      |      |      |
| Autres couvertures dont "mélange certifié"           | Cover      | 18.6  |      |      |      |
| Pois (autres que récoltés secs)                      | Fabaceae   | 390.2 | yes  |      |      |

| <b>Agri</b>                                          | <b>Agri_group</b> | <b>Areas</b> | <b>Bosc</b> | <b>Dime</b> | <b>Pyri</b> |
|------------------------------------------------------|-------------------|--------------|-------------|-------------|-------------|
| Luzerne                                              | Fabaceae          | 161.2        |             |             |             |
| Mélange protéagineux (culture principale) + céréales | Fabaceae          | 95.2         |             |             |             |
| Fèves et féveroles (sec)                             | Fabaceae          | 30           |             |             |             |
| Mélange graminées et légumineuses                    | Fabaceae          | 25.4         |             |             |             |
| Trèfle                                               | Fabaceae          | 24           |             |             |             |
| Pois (sec)                                           | Fabaceae          | 22           |             |             |             |
| Légumineuses                                         | Fabaceae          | 0.1          |             |             |             |
| Lin textile                                          | Flax              | 599.1        |             |             |             |
| Lin oléagineux                                       | Flax              | 4            |             |             |             |
| Cultures fruitières pluriannuelles                   | Fruits            | 212.8        | yes         | yes         | yes         |
| Cultures fruitières annuelles                        | Fruits            | 11.7         |             | yes         | yes         |
| Vignes                                               | Fruits            | 0.9          |             | yes         | yes         |
| Prairie permanente                                   | Grassland         | 15902        |             |             |             |
| Prairie temporaire                                   | Grassland         | 1371         |             |             |             |
| Pâturage à statut particulier                        | Grassland         | 52.5         |             |             |             |
| Cultures horticoles non comestibles                  | Horticulture      | 15           | yes         | yes         | yes         |
| Sapins de Noël                                       | Horticulture      | 5            | yes         | yes         |             |
| Pépinières                                           | Horticulture      | 4.9          | yes         | yes         |             |
| Autres fourrages                                     | Miscellaneous     | 428.2        |             |             |             |
| Couvert naturel                                      | Miscellaneous     | 37           |             |             |             |
| Boisement                                            | Miscellaneous     | 11.6         |             |             |             |
| Miscanthus                                           | Miscellaneous     | 7.4          |             |             |             |
| Terres retirées de la production                     | Miscellaneous     | 7.3          |             |             |             |
| Sarrasin                                             | Miscellaneous     | 1.8          |             |             |             |
| Chanvre non-alimentaire autre que chanvre textile    | Miscellaneous     | 0.1          |             |             |             |
| Pomme de terre de consommation                       | Potato            | 2734         |             |             | yes         |
| Pomme de terre (Plants)                              | Potato            | 114.6        |             |             | yes         |
| Pomme de terre féculière                             | Potato            | 31.7         |             |             | yes         |
| Pomme de terre (arrachage avant le 1er aout)         | Potato            | 8.8          |             |             | yes         |
| Pomme de terre (primeur, arrachage avant le 20 juin) | Potato            | 0.2          |             |             | yes         |

|                                 | <b>Agri</b> | <b>Agri_group</b> | <b>Areas</b> | <b>Bosc</b> | <b>Dime</b> | <b>Pyri</b> |
|---------------------------------|-------------|-------------------|--------------|-------------|-------------|-------------|
| Colza et navette d'hiver        |             | Rapeseed          | 941.5        |             |             | yes         |
| Colza et navette de printemps   |             | Rapeseed          | 11.5         |             |             | yes         |
| Cultures maraîchères            |             | Vegetables        | 587.7        | yes         |             | yes         |
| Cultures maraîchères sous verre |             | Vegetables        | 1.8          |             |             |             |
| Plantes aromatiques             |             | Vegetables        | 0.1          |             |             | yes         |

**Table S2b. Total areas (ha) for each grouped agricultural land use category in the 3000 m buffers around the apiaries and the areas of authorized crops for each pesticide**

The small differences between the areas for a same grouped land use are due to the fact that we considered the authorizations of each product relative to the detailed land uses.

| <b>Grouped land use</b> | <b>Total</b> | <b>Bosc.</b> | <b>Pyrim.</b> | <b>Dimet.</b> | <b>Detailed land uses</b>                  |
|-------------------------|--------------|--------------|---------------|---------------|--------------------------------------------|
| <b>Cereals</b>          | 16695        | 16632        | 0             | 0             | wheat, barley, spelt, oat, triticale, etc. |
| <b>Grassland</b>        | 15993        | 0            | 0             | 0             | permanent and temporary grasslands         |
| <b>Beet</b>             | 5190         | 0            | 0             | 5190          | sugar and fodder beet, root chicory        |
| <b>Corn</b>             | 4211         | 0            | 0             | 0             | grain and fodder corn                      |
| <b>Potato</b>           | 2711         | 2711         | 0             | 0             | mainly potato for food                     |
| <b>Rapeseed</b>         | 947          | 947          | 0             | 0             | rapeseed (mainly sown before the winter)   |
| <b>Fabaceae</b>         | 727          | 0            | 0             | 386           | peas, alfalfa, mixed protein crops, etc.   |
| <b>Cover</b>            | 611          | 0            | 0             | 0             | cover crops and set-aside field borders    |
| <b>Flax</b>             | 593          | 0            | 0             | 0             | flax                                       |
| <b>Vegetables</b>       | 521          | 520          | 0             | 520           | vegetables (including glasshouses)         |
| <b>Miscellaneous</b>    | 456          | 0            | 0             | 0             | misc. land uses, mainly "other fodder"     |
| <b>Fruits</b>           | 225          | 225          | 225           | 213           | perennial and annual fruits, vineyards     |
| <b>Horticulture</b>     | 25           | 15           | 25            | 25            | plant and tree nurseries, Christmas trees  |

**Fig. S1a and S1b : Heatmaps of the landscape dataset**

### Methods

The row dendrogram is based on Euclidean distance. The column dendrogram is based directly on the correlation matrix as similarity matrix. Both row and columns dendrogram use the Ward agglomerative algorithm. The blue colored band close to the row dendrogram represent the number of different pesticides for each apiary (white = 0, deepest blue = 5). The numbers represent the surface in hectares.

**Fig. S1a 500 m buffer heatmap**

The 500 m buffer heatmap is quite informative. You can clearly see that there are 3 groups of sites. One group with beet and potato cultures (on top), one group without beet and potato cultures but with cereals (in the middle) and one group with very few crops and generally more grasslands (at the bottom + 2 sites without major crops and without grasslands probably more urbanized areas)

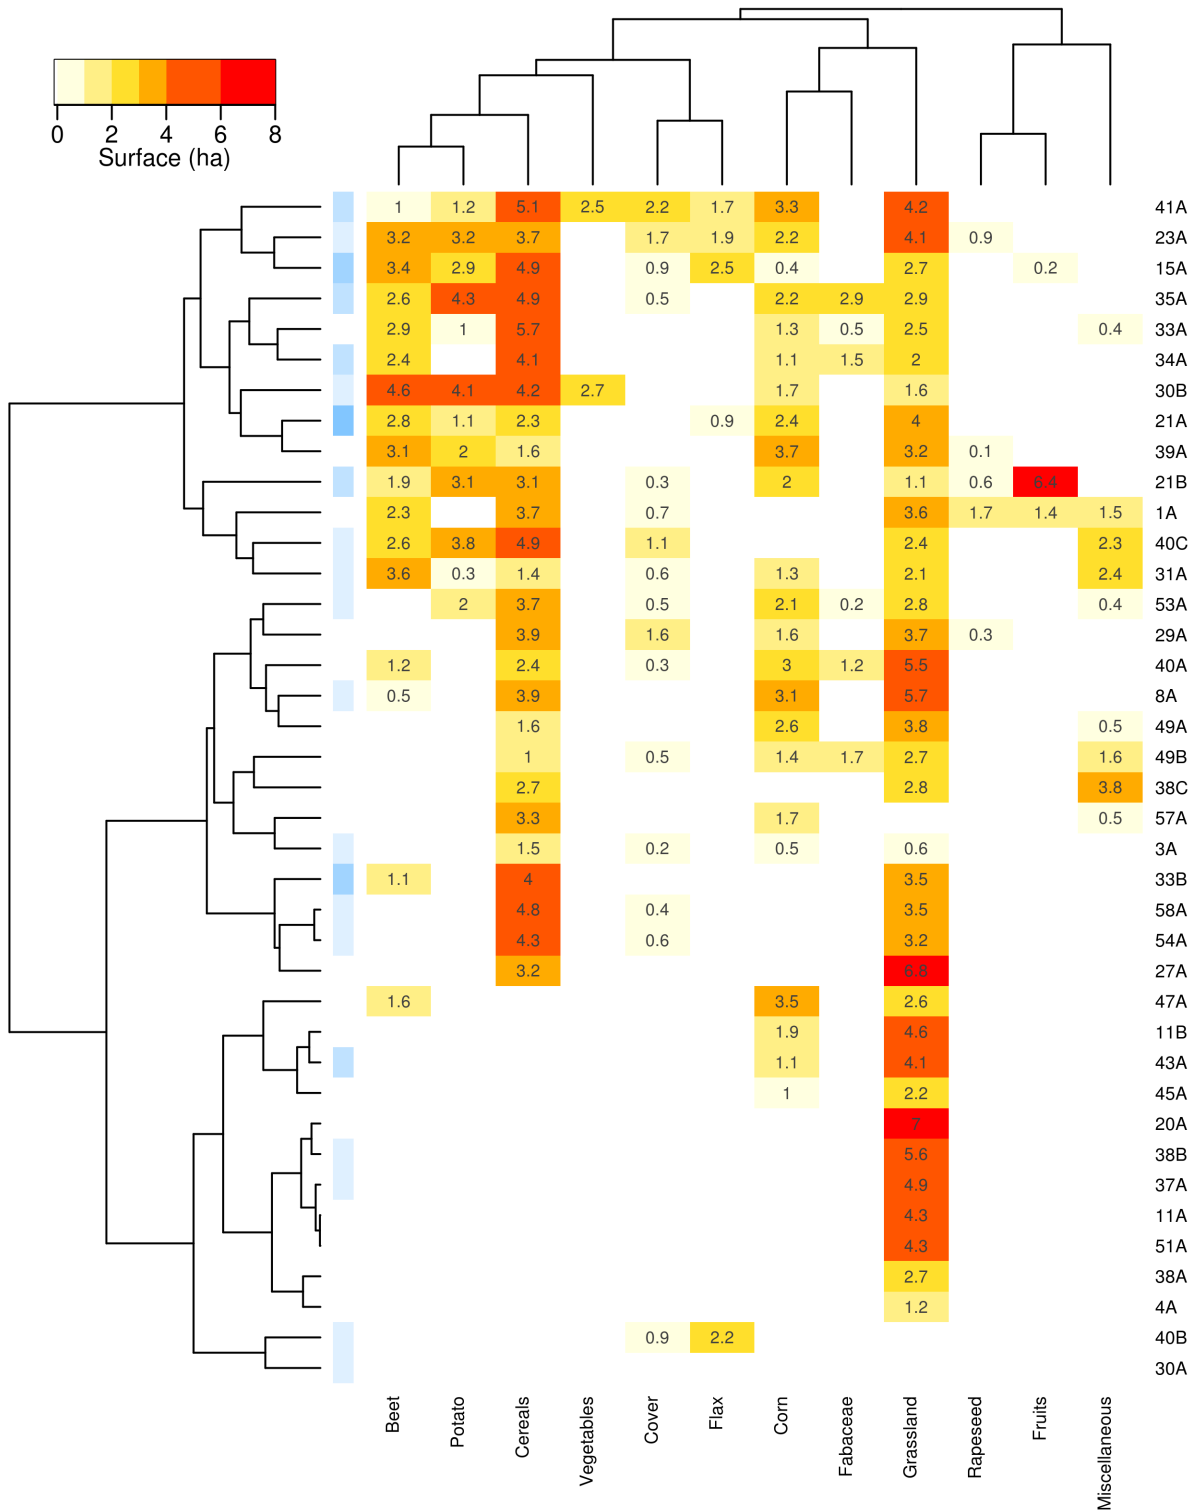



**Fig. S1b 3000 m buffer heatmap**

The 3000 m heatmap is less structured. You can see 2 clear groups : one with few big crops at the bottom (with or without grasslands) and one with lots of crops on top, particularly beet, potatoes, vegetables, etc. In fact you have a clear gradient in the dataset from sites with a lot of crops toward sites with few crops (either with grasslands or with non agricultural land uses). You can see also quite clearly that the samples with pesticides are clearly in the second group.

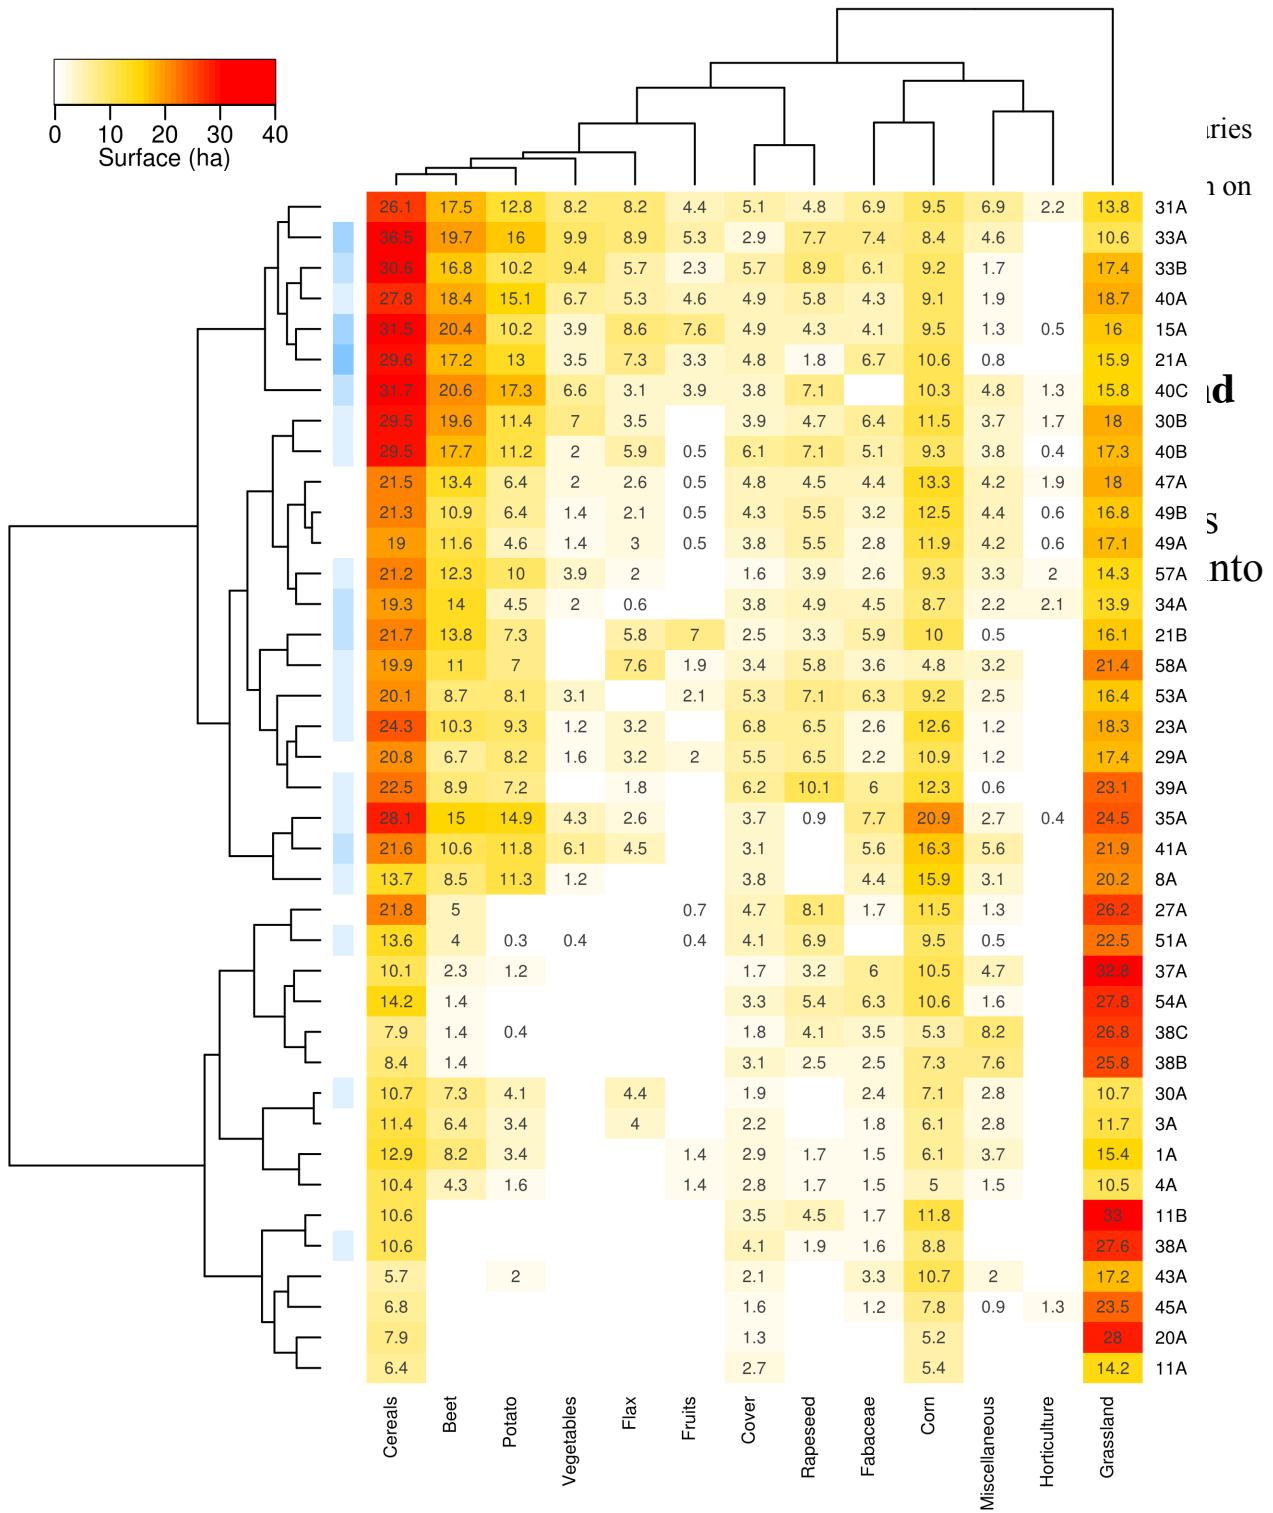

**Fig S1c. Heatmap of the correlation matrix of the areas of crops and grasslands 3000 m around the apiaries**

The numbers represent the Pearson correlation \* 100. The dendrograms are build with a ward algorithm on the correlation matrix transformed into distance matrix.

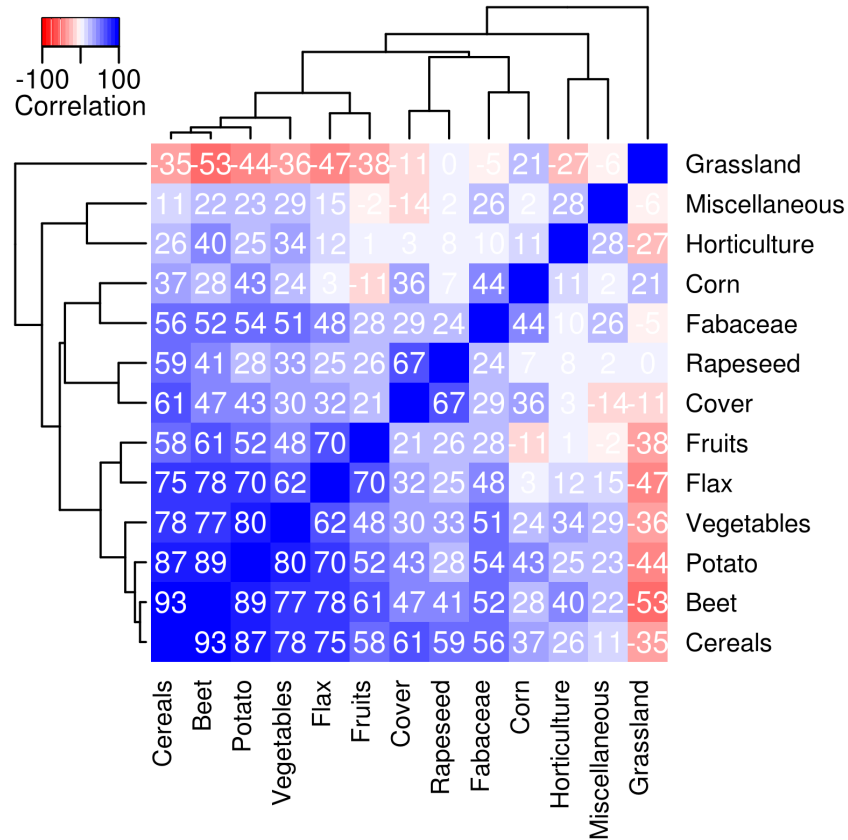

## Pollen: exploratory analysis

**Table S3: Pollen codes**

The pollen codes are summarized in the following table :

|           | <b>Pollen_type</b> | <b>Pollen_code</b> |
|-----------|--------------------|--------------------|
| <b>1</b>  | Anacardiaceae      | ana                |
| <b>2</b>  | Apiaceae           | api                |
| <b>3</b>  | Asteraceae         | ast                |
| <b>5</b>  | Balsaminaceae      | bal                |
| <b>6</b>  | Borraginaceae      | bor                |
| <b>7</b>  | Brassicaceae       | bra                |
| <b>8</b>  | Campanulaceae      | cam                |
| <b>10</b> | Caprifoliaceae     | cap                |
| <b>11</b> | Centaurea          | cen                |
| <b>13</b> | Cereals            | cer                |
| <b>14</b> | Chenopodiaceae     | che                |
| <b>15</b> | Cistaceae          | cis                |
| <b>18</b> | Epilobium          | epi                |
| <b>19</b> | Ericaceae          | eri                |
| <b>21</b> | Fruit trees        | fru                |
| <b>22</b> | Lamiaceae          | lam                |
| <b>23</b> | Hedera elix        | ivy                |
| <b>24</b> | unknown            | unk                |
| <b>25</b> | Oleaceae           | ole                |
| <b>26</b> | Sedum              | sed                |
| <b>27</b> | Rumex              | rum                |
| <b>28</b> | Phacelia           | pha                |
| <b>30</b> | Taraxacum          | tar                |
| <b>31</b> | Plantago           | pla                |
| <b>32</b> | Poaceae            | poa                |
| <b>35</b> | Renonculaceae      | ren                |
| <b>37</b> | Rhamnaceae sl      | rha                |
| <b>38</b> | Rubus              | rub                |
| <b>40</b> | Rosaceae           | ros                |
| <b>42</b> | Salix              | sal                |
| <b>44</b> | Trifolium          | tri                |

|           | <b>Pollen_type</b> | <b>Pollen_code</b> |
|-----------|--------------------|--------------------|
| <b>47</b> | Liliaceae sl       | lil                |
| <b>50</b> | Vicia              | vic                |
| <b>51</b> | Betulaceae         | bet                |
| <b>52</b> | Fagaceae           | fag                |

***Fig. S2a: Heatmap of the pollen dataset***

**Methods & description**

Ward dendrogram on the rows on Hellinger distances. Correlation on the columns after Hellinger transformation (Legendre & Legendre 2012).

The blue and green column on the left represent the sampling date : light green = July, green = August, light blue = September, dark blue = October.

The row names are composed of the Apiary ID and the number of the month (08 = August etc.) corresponding to the sample. We took only the 25 most abundant pollen types.

**Interpretation**

There are two main groups of samples (rows).

The bottom group is mainly composed of samples from August (green). This group is itself composed of two groups: one group has massively exploited clover (*Trifolium*), the other group has exploited a very wide variety of pollen resources including Rosaceae, Taraxacum, Other Asteraceae, Plantaginaceae, *Trifolium*, etc.

The top group is itself divided into 3 groups characterized by the massive exploitation of Phacelia or Ivy or Brassicaceae respectively.

Fig S2a.

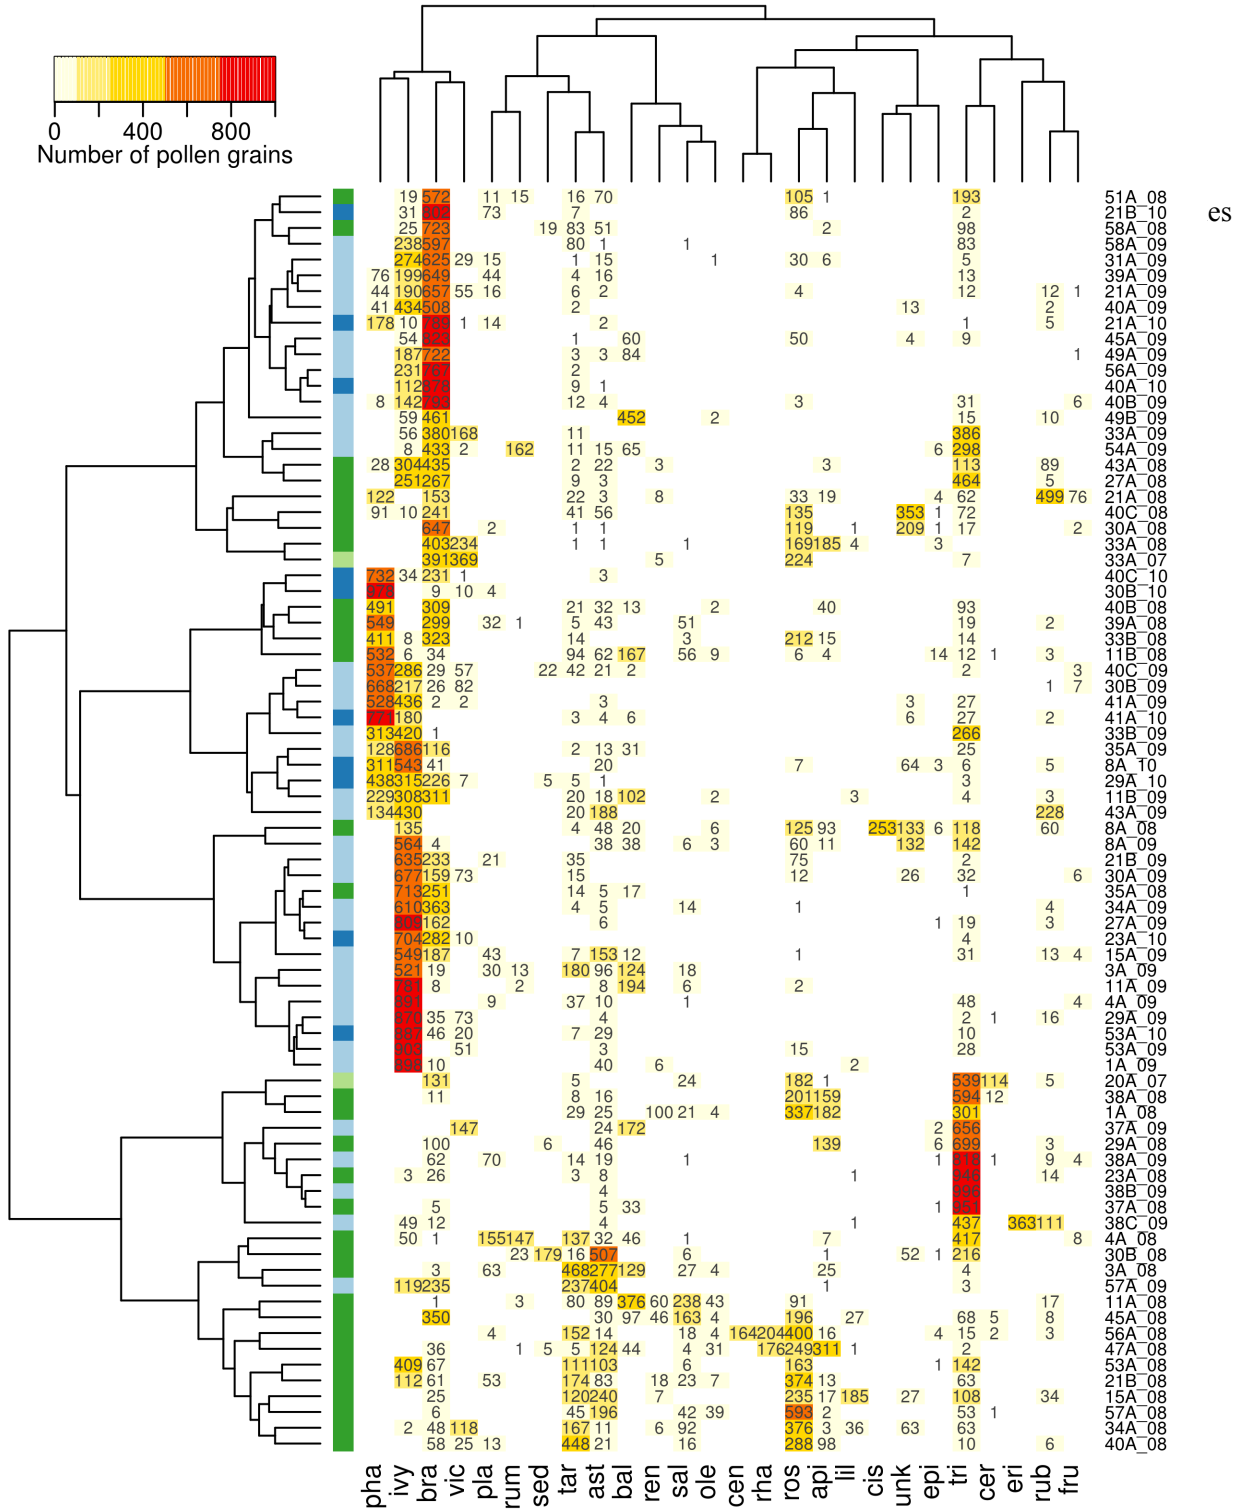

**Fig. S2b: Total number of pollen grains from different botanical origin per month**  
 The two samples form end July are not shown but have a composition very similar to the August samples  
 (see Supplementary 2 at <https://figshare.com/s/86785808b5709331aa1c> )

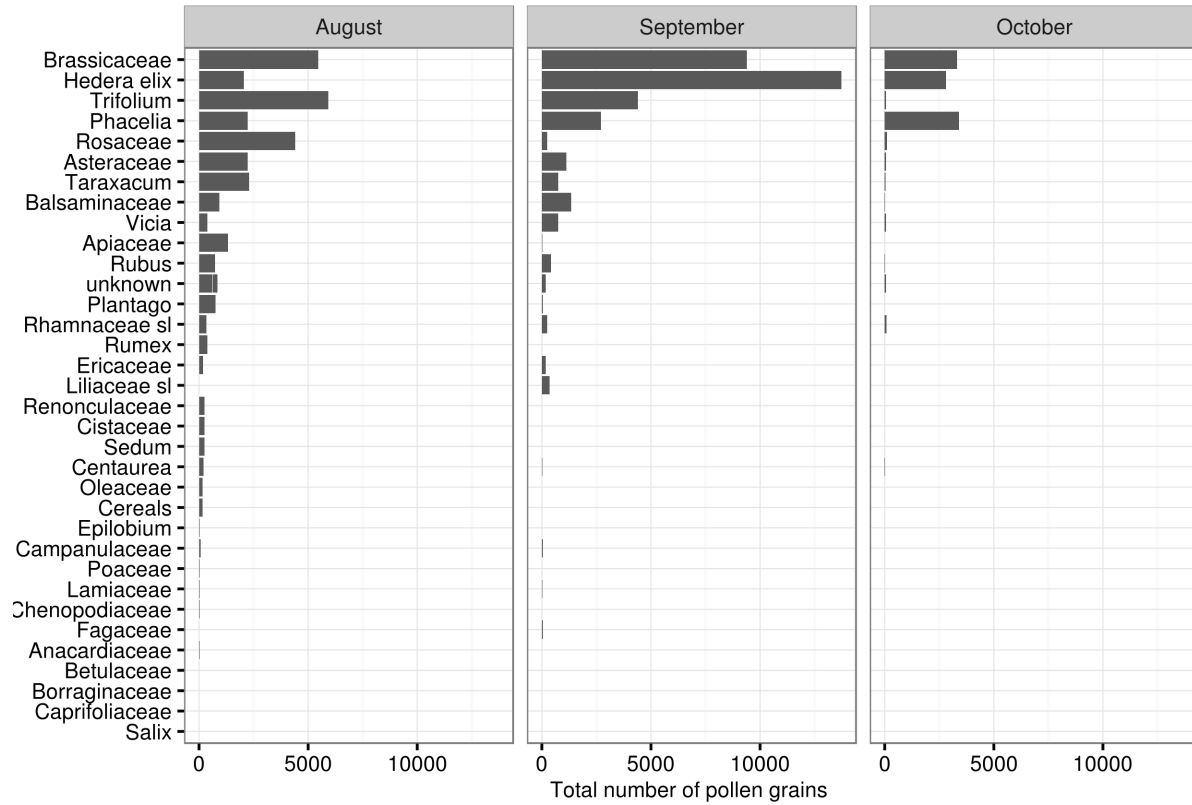

# **Pesticides vs Agricultural Landscape**

## ***Boscalid***

**Table S4: Boscalid vs cultures models**

| ID | Product | Buffer | Variable        | AICc  | AICc.<br>delta | AICc.<br>w | AUC   | slope | LRT   | p       |
|----|---------|--------|-----------------|-------|----------------|------------|-------|-------|-------|---------|
| 1  | bosc    | 3000   | Beet            | 40.01 | 0              | 0.604      | 0.894 | 0.33  | 29.14 | 0       |
| 2  | bosc    | 3000   | AllCrops        | 42.81 | 2.798          | 0.149      | 0.894 | 0.18  | 26.34 | 0       |
| 3  | bosc    | 3000   | AuthorizedCrops | 44.76 | 4.75           | 0.056      | 0.883 | 0.19  | 24.39 | 0       |
| 4  | bosc    | 3000   | Potato          | 45.24 | 5.231          | 0.044      | 0.92  | 0.36  | 23.9  | 0       |
| 5  | bosc    | 3000   | Cereals         | 45.74 | 5.734          | 0.034      | 0.863 | 0.21  | 23.4  | 0       |
| 6  | bosc    | 1000   | AllCrops        | 46.06 | 6.054          | 0.029      | 0.846 | 0.47  | 23.08 | 0       |
| 7  | bosc    | 1500   | AllCrops        | 46.4  | 6.386          | 0.025      | 0.851 | 0.31  | 22.75 | 0       |
| 8  | bosc    | 1500   | AuthorizedCrops | 47.03 | 7.016          | 0.018      | 0.854 | 0.34  | 22.12 | 0       |
| 9  | bosc    | 1000   | AuthorizedCrops | 47.35 | 7.344          | 0.015      | 0.84  | 0.53  | 21.79 | 0       |
| 10 | bosc    | 500    | AllCrops        | 48.79 | 8.779          | 0.007      | 0.834 | 0.7   | 20.36 | 1E-05   |
| 11 | bosc    | 1500   | Beet            | 50.08 | 10.07          | 0.004      | 0.823 | 0.43  | 19.07 | 1E-05   |
| 12 | bosc    | 1500   | Cereals         | 50.36 | 10.35          | 0.003      | 0.837 | 0.34  | 18.78 | 1E-05   |
| 13 | bosc    | 1000   | Cereals         | 50.49 | 10.48          | 0.003      | 0.817 | 0.51  | 18.66 | 2E-05   |
| 14 | bosc    | 500    | AuthorizedCrops | 51.44 | 11.43          | 0.002      | 0.806 | 0.63  | 17.71 | 3E-05   |
| 15 | bosc    | 3000   | Fruits          | 52.22 | 12.21          | 0.001      | 0.713 | 0.62  | 16.92 | 4E-05   |
| 16 | bosc    | 1000   | Beet            | 53.35 | 13.34          | 0.001      | 0.746 | 0.5   | 15.79 | 7E-05   |
| 17 | bosc    | 500    | Cereals         | 54.19 | 14.18          | 0.001      | 0.817 | 0.7   | 14.95 | 0.00011 |
| 18 | bosc    | 3000   | Vegetables      | 54.63 | 14.62          | 0          | 0.873 | 0.4   | 14.52 | 0.00014 |
| 19 | bosc    | 1000   | Flax            | 54.76 | 14.75          | 0          | 0.779 | 0.83  | 14.38 | 0.00015 |
| 20 | bosc    | 1500   | Flax            | 55.25 | 15.24          | 0          | 0.744 | 0.61  | 13.89 | 0.00019 |
| 21 | bosc    | 1500   | Potato          | 55.61 | 15.6           | 0          | 0.831 | 0.38  | 13.54 | 0.00023 |
| 22 | bosc    | 1000   | Fabaceae        | 56.08 | 16.07          | 0          | 0.701 | 0.99  | 13.06 | 3E-04   |
| 23 | bosc    | 3000   | Fabaceae        | 56.65 | 16.64          | 0          | 0.776 | 0.51  | 12.5  | 0.00041 |
| 24 | bosc    | 3000   | Flax            | 57.28 | 17.27          | 0          | 0.76  | 0.34  | 11.87 | 0.00057 |
| 25 | bosc    | 1500   | Fruits          | 58.88 | 18.87          | 0          | 0.671 | 0.74  | 10.27 | 0.00136 |
| 26 | bosc    | 1000   | Potato          | 59.44 | 19.43          | 0          | 0.761 | 0.42  | 9.7   | 0.00184 |
| 27 | bosc    | 500    | Potato          | 59.95 | 19.94          | 0          | 0.703 | 0.7   | 9.19  | 0.00243 |
| 28 | bosc    | 1500   | Vegetables      | 60.04 | 20.03          | 0          | 0.723 | 0.59  | 9.1   | 0.00255 |
| 29 | bosc    | 500    | Beet            | 60.11 | 20.11          | 0          | 0.721 | 0.63  | 9.03  | 0.00266 |
| 30 | bosc    | 1500   | Fabaceae        | 60.32 | 20.31          | 0          | 0.729 | 0.57  | 8.83  | 0.00296 |
| 31 | bosc    | 500    | Flax            | 61.54 | 21.53          | 0          | 0.623 | 1.32  | 7.6   | 0.00583 |
| 32 | bosc    | 500    | Fabaceae        | 61.98 | 21.97          | 0          | 0.654 | 1.75  | 7.16  | 0.00745 |
| 33 | bosc    | 1000   | Fruits          | 62.07 | 22.06          | 0          | 0.637 | 0.73  | 7.08  | 0.0078  |



| ID | Product | Buffer | Variable     | AICc  | AICc.<br>delta | AICc.<br>w | AUC   | slope | LRT  | p       |
|----|---------|--------|--------------|-------|----------------|------------|-------|-------|------|---------|
| 34 | bosc    | 1500   | Grassland    | 62.12 | 22.11          | 0          | 0.709 | -0.28 | 7.03 | 0.00801 |
| 35 | bosc    | 1000   | Vegetables   | 62.4  | 22.39          | 0          | 0.686 | 0.84  | 6.74 | 0.00941 |
| 36 | bosc    | 3000   | Grassland    | 62.97 | 22.96          | 0          | 0.669 | -0.15 | 6.18 | 0.01294 |
| 37 | bosc    | 1500   | Horticulture | 63.72 | 23.71          | 0          | 0.609 | 1.47  | 5.43 | 0.0198  |
| 38 | bosc    | 1000   | Grassland    | 65.35 | 25.34          | 0          | 0.629 | -0.25 | 3.8  | 0.05138 |
| 39 | bosc    | 500    | Fruits       | 65.68 | 25.67          | 0          | 0.551 | 0.51  | 3.47 | 0.06255 |
| 40 | bosc    | 3000   | Corn         | 66.64 | 26.63          | 0          | 0.577 | 0.14  | 2.5  | 0.1138  |
| 41 | bosc    | 500    | Grassland    | 66.78 | 26.77          | 0          | 0.606 | -0.27 | 2.37 | 0.1237  |
| 42 | bosc    | NA     | NULL MODEL   | 66.92 | 26.91          | 0          | 0.5   | NA    | NA   | NA      |
| 43 | bosc    | 500    | Corn         | 67.23 | 27.23          | 0          | 0.684 | 0.33  | 1.91 | 0.1669  |
| 44 | bosc    | 1000   | Corn         | 67.24 | 27.23          | 0          | 0.653 | 0.22  | 1.9  | 0.168   |
| 45 | bosc    | 500    | Cover        | 67.86 | 27.84          | 0          | 0.626 | 0.62  | 1.29 | 0.2561  |
| 46 | bosc    | 1500   | Corn         | 67.91 | 27.9           | 0          | 0.643 | 0.14  | 1.24 | 0.2657  |
| 47 | bosc    | 3000   | Cover        | 68.17 | 28.16          | 0          | 0.617 | 0.2   | 0.97 | 0.324   |
| 48 | bosc    | 3000   | Horticulture | 68.29 | 28.28          | 0          | 0.577 | 0.36  | 0.86 | 0.3548  |
| 49 | bosc    | 3000   | Rapeseed     | 68.29 | 28.28          | 0          | 0.589 | 0.09  | 0.85 | 0.3562  |
| 50 | bosc    | 1000   | Cover        | 68.3  | 28.29          | 0          | 0.666 | 0.31  | 0.85 | 0.3566  |
| 51 | bosc    | 500    | Rapeseed     | 68.5  | 28.49          | 0          | 0.544 | -0.78 | 0.65 | 0.4208  |
| 52 | bosc    | 1500   | Cover        | 68.65 | 28.64          | 0          | 0.674 | 0.21  | 0.5  | 0.4809  |
| 53 | bosc    | 500    | Vegetables   | 68.94 | 28.93          | 0          | 0.514 | 0.25  | 0.21 | 0.6475  |
| 54 | bosc    | 1500   | Rapeseed     | 69.09 | 29.08          | 0          | 0.573 | -0.04 | 0.06 | 0.8085  |
| 55 | bosc    | 1000   | Rapeseed     | 69.14 | 29.14          | 0          | 0.476 | 0     | 0    | 0.995   |

***Pyrimethanil*****Table S5: Pyrimethanil vs cultures models**

| <b>ID</b> | <b>Product</b> | <b>Buffer</b> | <b>Variable</b>  | <b>AICc</b> | <b>AICc.<br/>delta</b> | <b>AICc.<br/>w</b> | <b>AUC</b> | <b>slope</b> | <b>LRT</b> | <b>p</b> |
|-----------|----------------|---------------|------------------|-------------|------------------------|--------------------|------------|--------------|------------|----------|
| 1         | pyri           | 3000          | Rapeseed         | 42.18       | 0                      | 0.287              | 0.735      | 0.39         | 8.55       | 0.00346  |
| 2         | pyri           | 1000          | Rapeseed         | 43.69       | 1.515                  | 0.134              | 0.756      | 0.61         | 7.03       | 0.00801  |
| 3         | pyri           | 1500          | Rapeseed         | 44.25       | 2.074                  | 0.102              | 0.731      | 0.45         | 6.47       | 0.01095  |
| 4         | pyri           | 3000          | Flax             | 46.15       | 3.97                   | 0.039              | 0.793      | 0.24         | 4.58       | 0.0324   |
| 5         | pyri           | 3000          | Horticulture     | 46.82       | 4.64                   | 0.028              | 0.641      | -1.93        | 3.91       | 0.04807  |
| 6         | pyri           | 500           | Beet             | 47.09       | 4.908                  | 0.025              | 0.683      | 0.47         | 3.64       | 0.05643  |
| 7         | pyri           | 3000          | Cover            | 47.36       | 5.178                  | 0.022              | 0.63       | 0.48         | 3.37       | 0.06643  |
| 8         | pyri           | 500           | Potato           | 47.36       | 5.184                  | 0.021              | 0.659      | 0.46         | 3.36       | 0.06666  |
| 9         | pyri           | 1000          | Fabaceae         | 47.66       | 5.482                  | 0.018              | 0.619      | 0.52         | 3.07       | 0.07999  |
| 10        | pyri           | 3000          | Cereals          | 47.78       | 5.599                  | 0.017              | 0.719      | 0.07         | 2.95       | 0.086    |
| 11        | pyri           | 1000          | Beet             | 48.11       | 5.93                   | 0.015              | 0.65       | 0.22         | 2.62       | 0.1057   |
| 12        | pyri           | 3000          | All Crops        | 48.33       | 6.154                  | 0.013              | 0.696      | 0.05         | 2.39       | 0.1218   |
| 13        | pyri           | NA            | NULL MODEL       | 48.5        | 6.322                  | 0.012              | 0.5        | NA           | NA         | NA       |
| 14        | pyri           | 500           | All Crops        | 48.52       | 6.341                  | 0.012              | 0.674      | 0.22         | 2.21       | 0.1374   |
| 15        | pyri           | 1500          | Fabaceae         | 48.59       | 6.415                  | 0.012              | 0.544      | 0.32         | 2.13       | 0.1442   |
| 16        | pyri           | 3000          | Fruits           | 48.61       | 6.433                  | 0.011              | 0.676      | 0.21         | 2.11       | 0.1459   |
| 17        | pyri           | 1500          | Fruits           | 48.95       | 6.769                  | 0.01               | 0.596      | 0.26         | 1.78       | 0.1823   |
| 18        | pyri           | 1500          | Beet             | 49.03       | 6.853                  | 0.009              | 0.626      | 0.13         | 1.69       | 0.193    |
| 19        | pyri           | 3000          | Beet             | 49.09       | 6.913                  | 0.009              | 0.67       | 0.07         | 1.63       | 0.2011   |
| 20        | pyri           | 1000          | Potato           | 49.15       | 6.971                  | 0.009              | 0.604      | 0.19         | 1.58       | 0.2093   |
| 21        | pyri           | 1000          | Fruits           | 49.42       | 7.242                  | 0.008              | 0.596      | 0.25         | 1.3        | 0.2533   |
| 22        | pyri           | 1000          | Authorized Crops | 49.42       | 7.243                  | 0.008              | 0.596      | 0.25         | 1.3        | 0.2535   |
| 23        | pyri           | 1500          | Horticulture     | 49.47       | 7.291                  | 0.007              | 0.537      | -1.3         | 1.26       | 0.2623   |
| 24        | pyri           | 3000          | Authorized Crops | 49.54       | 7.36                   | 0.007              | 0.617      | 0.17         | 1.19       | 0.2758   |
| 25        | pyri           | 1000          | Grassland        | 49.56       | 7.38                   | 0.007              | 0.646      | -0.17        | 1.17       | 0.2799   |
| 26        | pyri           | 1500          | Authorized Crops | 49.58       | 7.405                  | 0.007              | 0.563      | 0.22         | 1.14       | 0.2851   |
| 27        | pyri           | 500           | Flax             | 49.66       | 7.484                  | 0.007              | 0.569      | 0.49         | 1.06       | 0.3024   |
| 28        | pyri           | 500           | Fabaceae         | 49.71       | 7.533                  | 0.007              | 0.533      | -1.07        | 1.01       | 0.3138   |
| 29        | pyri           | 1000          | Cover            | 49.73       | 7.551                  | 0.007              | 0.628      | 0.41         | 1          | 0.3183   |
| 30        | pyri           | 500           | Authorized Crops | 49.74       | 7.557                  | 0.007              | 0.594      | 0.24         | 0.99       | 0.3196   |
| 31        | pyri           | 500           | Fruits           | 49.74       | 7.56                   | 0.007              | 0.594      | 0.24         | 0.99       | 0.3204   |

| ID | Product | Buffer | Variable   | AICc  | AICc.<br>delta | AICc.<br>w | AUC   | slope | LRT  | p      |
|----|---------|--------|------------|-------|----------------|------------|-------|-------|------|--------|
| 32 | pyri    | 3000   | Fabaceae   | 49.81 | 7.628          | 0.006      | 0.583 | 0.15  | 0.92 | 0.3377 |
| 33 | pyri    | 500    | Vegetables | 49.95 | 7.775          | 0.006      | 0.533 | -6.17 | 0.77 | 0.3797 |
| 34 | pyri    | 1500   | Cover      | 50    | 7.82           | 0.006      | 0.593 | 0.31  | 0.73 | 0.394  |
| 35 | pyri    | 1000   | All Crops  | 50.01 | 7.831          | 0.006      | 0.587 | 0.07  | 0.72 | 0.3973 |
| 36 | pyri    | 1000   | Flax       | 50.02 | 7.842          | 0.006      | 0.609 | 0.2   | 0.71 | 0.4011 |
| 37 | pyri    | 500    | Cereals    | 50.08 | 7.896          | 0.006      | 0.644 | 0.15  | 0.65 | 0.4197 |
| 38 | pyri    | 500    | Grassland  | 50.08 | 7.901          | 0.006      | 0.581 | -0.17 | 0.65 | 0.4213 |
| 39 | pyri    | 3000   | Potato     | 50.19 | 8.013          | 0.005      | 0.619 | 0.05  | 0.53 | 0.4649 |
| 40 | pyri    | 1500   | Flax       | 50.24 | 8.057          | 0.005      | 0.576 | 0.13  | 0.49 | 0.4837 |
| 41 | pyri    | 1500   | Vegetables | 50.24 | 8.059          | 0.005      | 0.554 | -0.19 | 0.49 | 0.4847 |
| 42 | pyri    | 1500   | All Crops  | 50.28 | 8.101          | 0.005      | 0.57  | 0.04  | 0.45 | 0.5043 |
| 43 | pyri    | 500    | Rapeseed   | 50.37 | 8.189          | 0.005      | 0.63  | 0.54  | 0.36 | 0.5496 |
| 44 | pyri    | 1500   | Corn       | 50.39 | 8.207          | 0.005      | 0.6   | -0.09 | 0.34 | 0.5595 |
| 45 | pyri    | 3000   | Grassland  | 50.39 | 8.208          | 0.005      | 0.589 | -0.04 | 0.34 | 0.5603 |
| 46 | pyri    | 1000   | Corn       | 50.44 | 8.26           | 0.005      | 0.598 | -0.11 | 0.29 | 0.5919 |
| 47 | pyri    | 1500   | Cereals    | 50.53 | 8.347          | 0.004      | 0.574 | 0.03  | 0.2  | 0.6542 |
| 48 | pyri    | 1000   | Cereals    | 50.62 | 8.443          | 0.004      | 0.559 | 0.03  | 0.1  | 0.747  |
| 49 | pyri    | 3000   | Vegetables | 50.63 | 8.454          | 0.004      | 0.522 | 0.04  | 0.09 | 0.7602 |
| 50 | pyri    | 1000   | Vegetables | 50.63 | 8.456          | 0.004      | 0.541 | -0.12 | 0.09 | 0.7629 |
| 51 | pyri    | 500    | Cover      | 50.68 | 8.497          | 0.004      | 0.52  | 0.15  | 0.05 | 0.8223 |
| 52 | pyri    | 1500   | Grassland  | 50.68 | 8.497          | 0.004      | 0.541 | -0.03 | 0.05 | 0.8227 |
| 53 | pyri    | 3000   | Corn       | 50.68 | 8.498          | 0.004      | 0.552 | -0.02 | 0.05 | 0.8237 |
| 54 | pyri    | 500    | Corn       | 50.68 | 8.505          | 0.004      | 0.474 | 0.06  | 0.04 | 0.8368 |
| 55 | pyri    | 1500   | Potato     | 50.7  | 8.523          | 0.004      | 0.513 | 0.02  | 0.02 | 0.8758 |

**Table S6: Pyrimethanil vs peas crops models**

Here we examine the hypothesis that pyrimethanil treatments of peas could explain pyrimethanil contaminations (in the previous analysis, peas are in the grouped culture Fabaceae with other crops from this family) The peas models performs better than the null model and that the previous Fabaceae models however these models are not very good (difference of AICc low and AUC low).

| ID | Product | Buffer | Variable   | AICc  | AICc.<br>delta | AICc.<br>w | AUC   | slope | LRT  | p       |
|----|---------|--------|------------|-------|----------------|------------|-------|-------|------|---------|
| 1  | pyri    | 1500   | peas       | 44.9  | 0              | 0.436      | 0.665 | 0.51  | 5.82 | 0.01582 |
| 2  | pyri    | 1000   | peas       | 45.66 | 0.752          | 0.299      | 0.676 | 0.66  | 5.07 | 0.02433 |
| 3  | pyri    | 3000   | peas       | 46.85 | 1.942          | 0.165      | 0.739 | 0.27  | 3.88 | 0.04884 |
| 4  | pyri    | NA     | NULL MODEL | 48.5  | 3.598          | 0.072      | 0.5   | NA    | NA   | NA      |
| 5  | pyri    | 500    | peas       | 50.37 | 5.47           | 0.028      | 0.481 | -0.61 | 0.35 | 0.5526  |

**Dimethoate****Table S7: Dimethoate vs cultures models**

| ID | Product | Buffer | Variable        | AICc  | AICc.<br>delta | AICc.<br>w | AUC   | slope | LRT   | p       |
|----|---------|--------|-----------------|-------|----------------|------------|-------|-------|-------|---------|
| 1  | dime    | 1000   | Cereals         | 16.52 | 0              | 0.989      | 0.991 | 3.32  | 37.55 | 0       |
| 2  | dime    | 1000   | AllCrops        | 26.93 | 10.4           | 0.005      | 0.955 | 0.93  | 27.15 | 0       |
| 3  | dime    | 1500   | Beet            | 29.61 | 13.08          | 0.001      | 0.942 | 0.77  | 24.47 | 0       |
| 4  | dime    | 1000   | Beet            | 30.29 | 13.76          | 0.001      | 0.946 | 0.97  | 23.79 | 0       |
| 5  | dime    | 1500   | Cereals         | 30.68 | 14.15          | 0.001      | 0.906 | 0.62  | 23.4  | 0       |
| 6  | dime    | 1500   | AuthorizedCrops | 31.37 | 14.85          | 0.001      | 0.92  | 0.67  | 22.7  | 0       |
| 7  | dime    | 1500   | AllCrops        | 31.4  | 14.88          | 0.001      | 0.929 | 0.46  | 22.67 | 0       |
| 8  | dime    | 1000   | AuthorizedCrops | 33.26 | 16.73          | 0          | 0.924 | 0.72  | 20.82 | 1E-05   |
| 9  | dime    | 3000   | Beet            | 33.73 | 17.21          | 0          | 0.915 | 0.36  | 20.34 | 1E-05   |
| 10 | dime    | 3000   | AuthorizedCrops | 34.36 | 17.84          | 0          | 0.924 | 0.3   | 19.71 | 1E-05   |
| 11 | dime    | 500    | Beet            | 36.15 | 19.62          | 0          | 0.897 | 1.24  | 17.93 | 2E-05   |
| 12 | dime    | 1000   | Vegetables      | 36.19 | 19.67          | 0          | 0.761 | 1.67  | 17.88 | 2E-05   |
| 13 | dime    | 3000   | AllCrops        | 37.03 | 20.51          | 0          | 0.902 | 0.17  | 17.04 | 4E-05   |
| 14 | dime    | 3000   | Cereals         | 37.3  | 20.78          | 0          | 0.884 | 0.22  | 16.77 | 4E-05   |
| 15 | dime    | 500    | Cereals         | 40.09 | 23.57          | 0          | 0.911 | 1.02  | 13.98 | 0.00018 |
| 16 | dime    | 500    | AllCrops        | 41.03 | 24.5           | 0          | 0.902 | 0.67  | 13.04 | 3E-04   |
| 17 | dime    | 3000   | Potato          | 41.3  | 24.78          | 0          | 0.871 | 0.3   | 12.77 | 0.00035 |
| 18 | dime    | 3000   | Vegetables      | 41.5  | 24.97          | 0          | 0.888 | 0.4   | 12.58 | 0.00039 |
| 19 | dime    | 1500   | Vegetables      | 42.76 | 26.24          | 0          | 0.79  | 0.71  | 11.31 | 0.00077 |
| 20 | dime    | 1500   | Flax            | 43.45 | 26.92          | 0          | 0.772 | 0.58  | 10.63 | 0.00111 |
| 21 | dime    | 500    | AuthorizedCrops | 43.71 | 27.19          | 0          | 0.866 | 0.62  | 10.36 | 0.00129 |
| 22 | dime    | 1000   | Flax            | 44.21 | 27.69          | 0          | 0.79  | 0.74  | 9.86  | 0.00169 |
| 23 | dime    | 1500   | Grassland       | 46.11 | 29.59          | 0          | 0.741 | -0.39 | 7.96  | 0.00477 |
| 24 | dime    | 3000   | Flax            | 46.35 | 29.82          | 0          | 0.812 | 0.32  | 7.73  | 0.00544 |
| 25 | dime    | 500    | Vegetables      | 46.68 | 30.16          | 0          | 0.643 | 7.45  | 7.39  | 0.00655 |
| 26 | dime    | 1500   | Horticulture    | 47.1  | 30.57          | 0          | 0.754 | 1.69  | 6.98  | 0.00825 |
| 27 | dime    | 1500   | Potato          | 47.52 | 31             | 0          | 0.792 | 0.3   | 6.55  | 0.01048 |
| 28 | dime    | 1000   | Potato          | 47.59 | 31.06          | 0          | 0.783 | 0.39  | 6.49  | 0.01088 |
| 29 | dime    | 3000   | Grassland       | 47.72 | 31.2           | 0          | 0.723 | -0.21 | 6.35  | 0.01172 |
| 30 | dime    | 3000   | Fabaceae        | 48.09 | 31.57          | 0          | 0.712 | 0.43  | 5.98  | 0.01443 |
| 31 | dime    | 500    | Potato          | 48.65 | 32.12          | 0          | 0.826 | 0.58  | 5.43  | 0.01984 |
| 32 | dime    | 1000   | Fabaceae        | 49.23 | 32.71          | 0          | 0.618 | 0.65  | 4.84  | 0.02778 |

| <b>ID</b> | <b>Product</b> | <b>Buffer</b> | <b>Variable</b> | <b>AICc</b> | <b>AICc.<br/>delta</b> | <b>AICc.<br/>w</b> | <b>AUC</b> | <b>slope</b> | <b>LRT</b> | <b>p</b> |
|-----------|----------------|---------------|-----------------|-------------|------------------------|--------------------|------------|--------------|------------|----------|
| 33        | dime           | 1000          | Grassland       | 49.76       | 33.24                  | 0                  | 0.712      | -0.33        | 4.31       | 0.03784  |
| 34        | dime           | 3000          | Fruits          | 49.94       | 33.41                  | 0                  | 0.654      | 0.29         | 4.14       | 0.04191  |
| 35        | dime           | 500           | Rapeseed        | 50.34       | 33.81                  | 0                  | 0.578      | -108.4       | 3.74       | 0.05327  |
| 36        | dime           | 3000          | Horticulture    | 50.45       | 33.93                  | 0                  | 0.67       | 0.84         | 3.62       | 0.05701  |
| 37        | dime           | 500           | Flax            | 50.75       | 34.22                  | 0                  | 0.679      | 0.83         | 3.33       | 0.06818  |
| 38        | dime           | NA            | NULL MODEL      | 51.85       | 35.32                  | 0                  | 0.5        | NA           | NA         | NA       |
| 39        | dime           | 500           | Fabaceae        | 52.41       | 35.89                  | 0                  | 0.576      | 0.72         | 1.66       | 0.1972   |
| 40        | dime           | 1500          | Fabaceae        | 52.77       | 36.24                  | 0                  | 0.585      | 0.25         | 1.31       | 0.2525   |
| 41        | dime           | 500           | Fruits          | 52.98       | 36.46                  | 0                  | 0.464      | -1.07        | 1.09       | 0.296    |
| 42        | dime           | 500           | Grassland       | 53.38       | 36.85                  | 0                  | 0.638      | -0.18        | 0.7        | 0.4031   |
| 43        | dime           | 500           | Cover           | 53.53       | 37.01                  | 0                  | 0.58       | 0.47         | 0.54       | 0.4625   |
| 44        | dime           | 500           | Corn            | 53.55       | 37.03                  | 0                  | 0.618      | 0.21         | 0.52       | 0.4696   |
| 45        | dime           | 3000          | Rapeseed        | 53.68       | 37.15                  | 0                  | 0.551      | 0.07         | 0.4        | 0.5287   |
| 46        | dime           | 3000          | Corn            | 53.77       | 37.25                  | 0                  | 0.58       | 0.06         | 0.3        | 0.584    |
| 47        | dime           | 1500          | Rapeseed        | 53.78       | 37.26                  | 0                  | 0.498      | 0.09         | 0.29       | 0.5903   |
| 48        | dime           | 1000          | Fruits          | 53.83       | 37.31                  | 0                  | 0.446      | -0.15        | 0.24       | 0.6221   |
| 49        | dime           | 1000          | Cover           | 53.93       | 37.4                   | 0                  | 0.469      | -0.16        | 0.15       | 0.7023   |
| 50        | dime           | 3000          | Cover           | 53.97       | 37.45                  | 0                  | 0.562      | 0.08         | 0.1        | 0.7459   |
| 51        | dime           | 1000          | Rapeseed        | 54.06       | 37.54                  | 0                  | 0.565      | -0.03        | 0.01       | 0.9088   |
| 52        | dime           | 1500          | Fruits          | 54.06       | 37.54                  | 0                  | 0.556      | 0.03         | 0.01       | 0.9094   |
| 53        | dime           | 1500          | Corn            | 54.07       | 37.55                  | 0                  | 0.518      | 0.01         | 0          | 0.9576   |
| 54        | dime           | 1000          | Corn            | 54.07       | 37.55                  | 0                  | 0.475      | -0.01        | 0          | 0.9581   |
| 55        | dime           | 1500          | Cover           | 54.07       | 37.55                  | 0                  | 0.589      | 0.01         | 0          | 0.9698   |

## Pollen vs Landscape

### *Fig. S3 Pollen vs landscape RDA triplot*

#### Methods

We performed a redundancy analysis (RDA) to see if the matrix of pollen type can be explained by the matrix of agricultural land use areas. This is equivalent to a multiple regression with more than one dependent y variable. This method also uses PCA approaches to obtain a visual summary of the results (triplots).

We performed a Hellinger transformation on the pollen data (to avoid double 0 to be considered as similarities) and a square root transformation of the landscape areas. We worked on a standardized pollen matrix (after Hellinger transformation) and we used the 1500 m buffer data and grouped Beet Potato and cereals areas to lessen multicollinearity problems. We used the 10 most abundant pollen types to simplify the plot.

#### Interpretation

The adjusted R squared shows that the landscape data explains only ~9% of the pollen data variance (27% for unadjusted R<sup>2</sup>). The correlation between pollen type is very low so it is difficult to find a matrix that explains most of the variance.

```
## $r.squared
## [1] 0.2685294
##
## $adj.r.squared
## [1] 0.09361248
```

In the following plot you can interpret the angles between the pollen (red lines) and land use areas (blue arrows) as correlation. The first two axes explain 56% of the constrained variance (58% \* 9% of the total variance) So this plan is a correct representation of the variance explained by the land use areas.

The triplot suggests the following correlations :

- a positive relationship between Vicia pollen and BeetCeralsPotato and Vegetables
- a positive relationship between Trifolium pollen and Grasslands
- a positive relationship between Rosaceae, taraxacum pollen and Fruits cultures and horticulture
- a negative relationship between the last 2 groups
- a negative relationship between Asteraceae pollen and Rapeseed

NB : RDA is a simplified representation of complex dataset. Some relationship might be hidden in other dimensions.

**Fig S3: Pollen vs landscape RDA triplot**

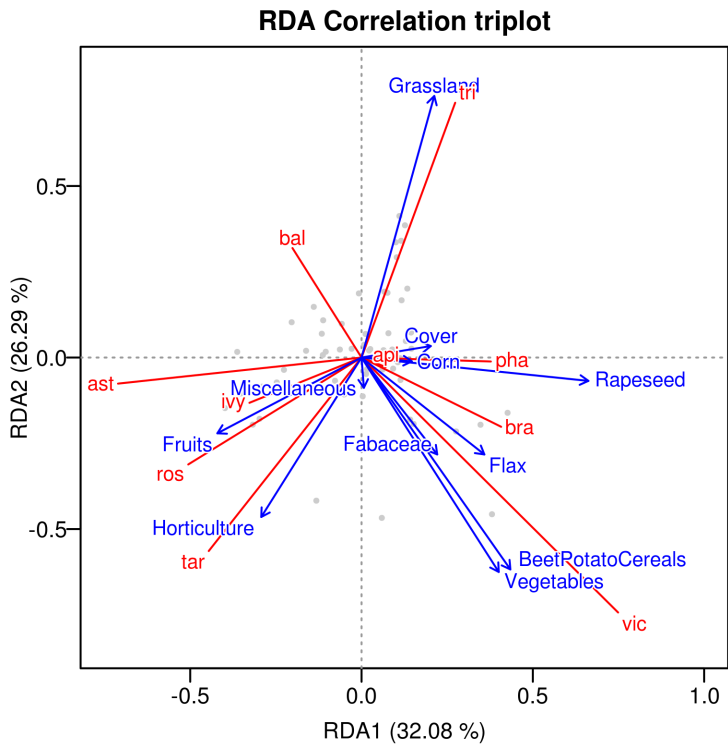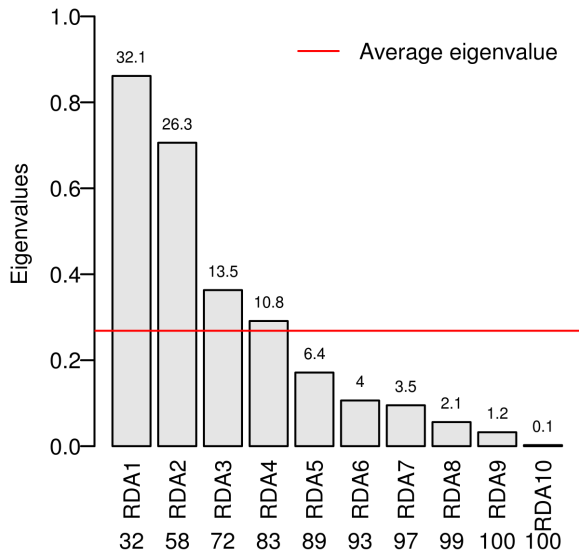

Supplement: 41598_2017_3467_MOESM1_ESM.pdf [file 41598_2017_3467_MOESM1_ESM.pdf]
